# Supplementary material for: Metallaaromaticity – a protean world
Source: Royal Society of Chemistry journal article supplement (doi:10.1039/d2cp04846a), 2022-01-01
Supplement: d2cp04846a1.pdf [file d2cp04846a1.pdf]

## Electronic Supporting Information

### **Metallaaromaticity – A Protean World**

Ben Joseph R. Cuyacot<sup>1</sup>, Zahra Badri<sup>1</sup>, Abhik Ghosh<sup>2\*</sup>, Cina Foroutan-Nejad<sup>1\*</sup>

1. Institute of Organic Chemistry, Polish Academy of Sciences, Kasprzaka44/52, 01–224,  
Warsaw, Poland

2. Department of Chemistry, UiT – The Arctic University of Norway, 9037 Tromsø, Norway

Corresponding Authors E-mails:

[abhik.ghosh@uit.no](mailto:abhik.ghosh@uit.no)

[cforoutan-nejad@icho.edu.pl](mailto:cforoutan-nejad@icho.edu.pl)

**The HOMOs of complexes and contributions of each MO in the magnetically induced current density.**

|                                          |              |
|------------------------------------------|--------------|
| Molecule 1.....                          | Page S3-S4   |
| Molecule 2.....                          | Page S5-S6   |
| Molecule 3.....                          | Page S7-S8   |
| Molecule 4.....                          | Page S9-S10  |
| Molecule 5.....                          | Page S11-S12 |
| Molecule 6.....                          | Page S13-S14 |
| Molecule 7.....                          | Page S15-S16 |
| Optimized coordinates of molecules ..... | Page S17-S19 |

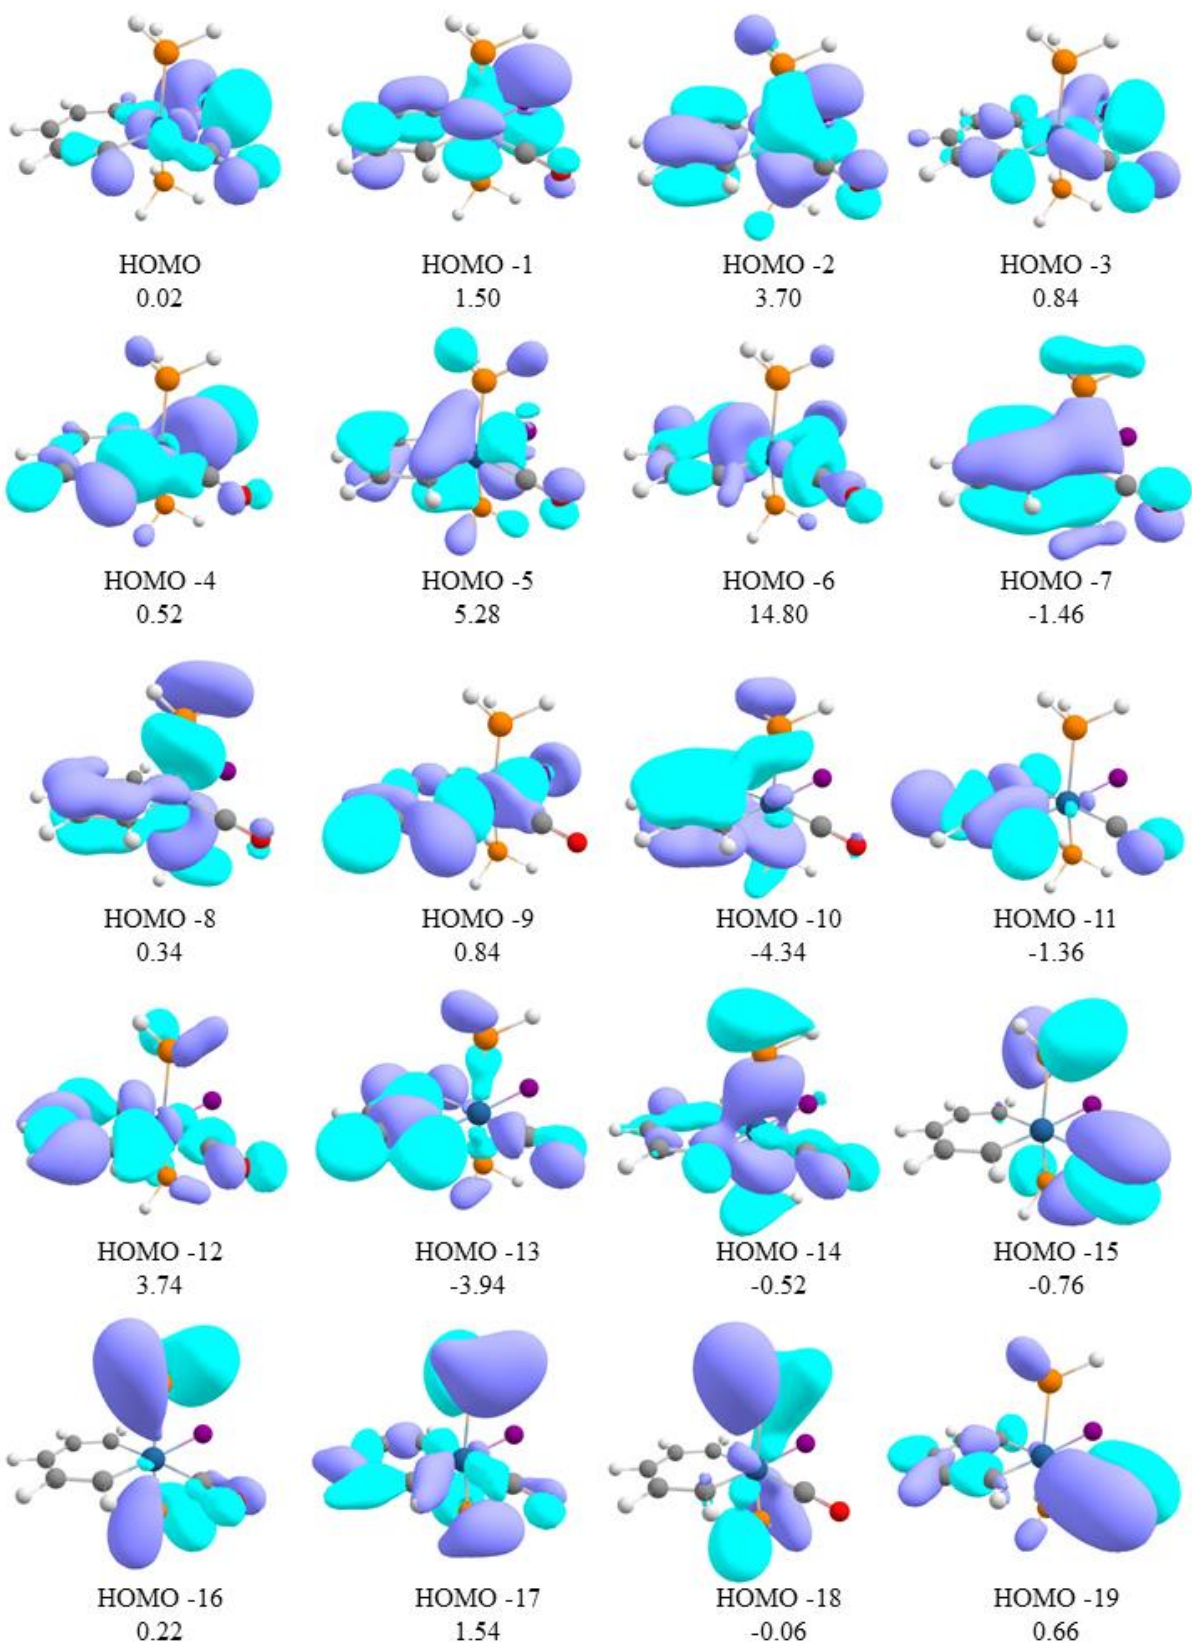

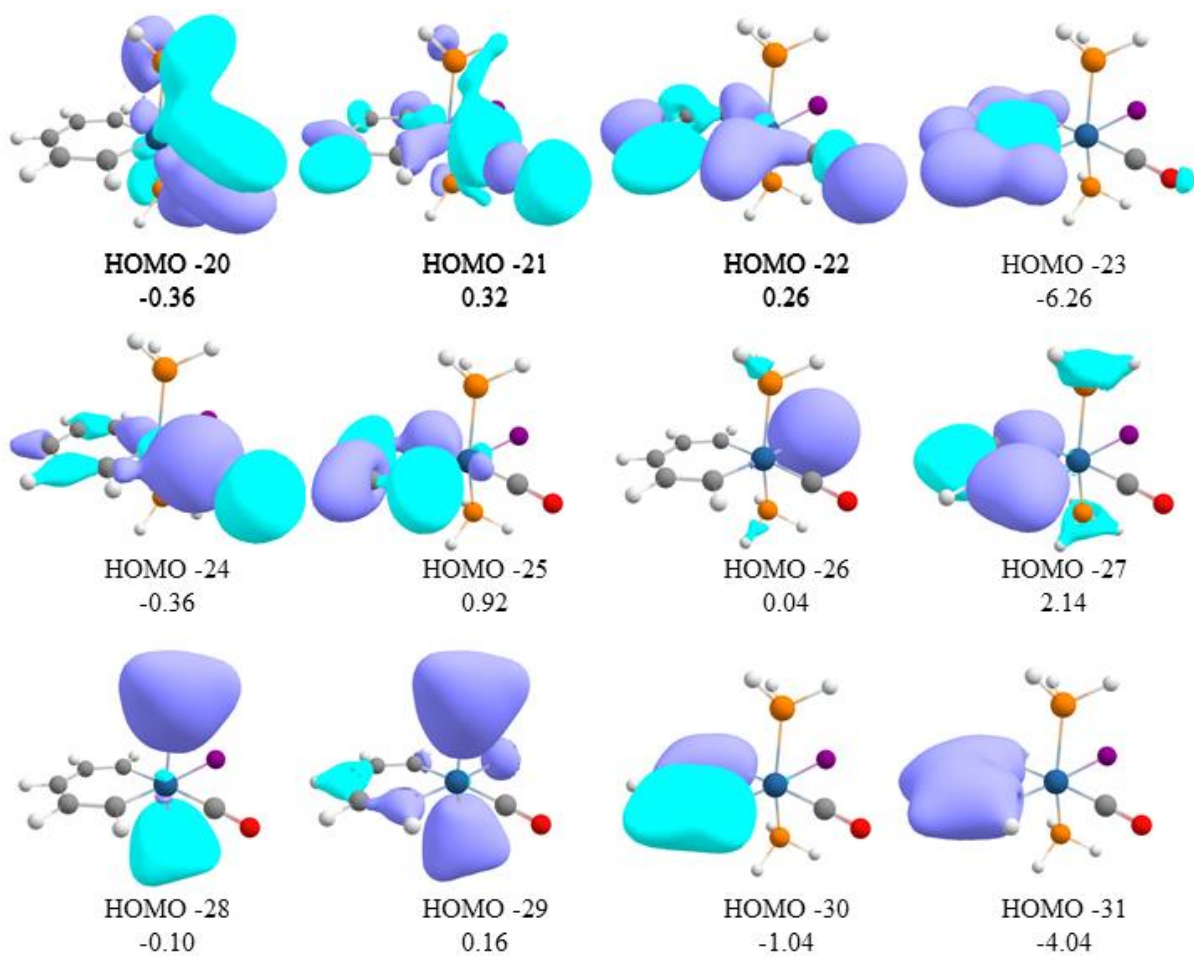

**Figure S1.** Valence molecular orbitals of molecule **1** and their contribution to the magnetically induced current intensity in  $\text{nA}\cdot\text{T}^{-1}$ .

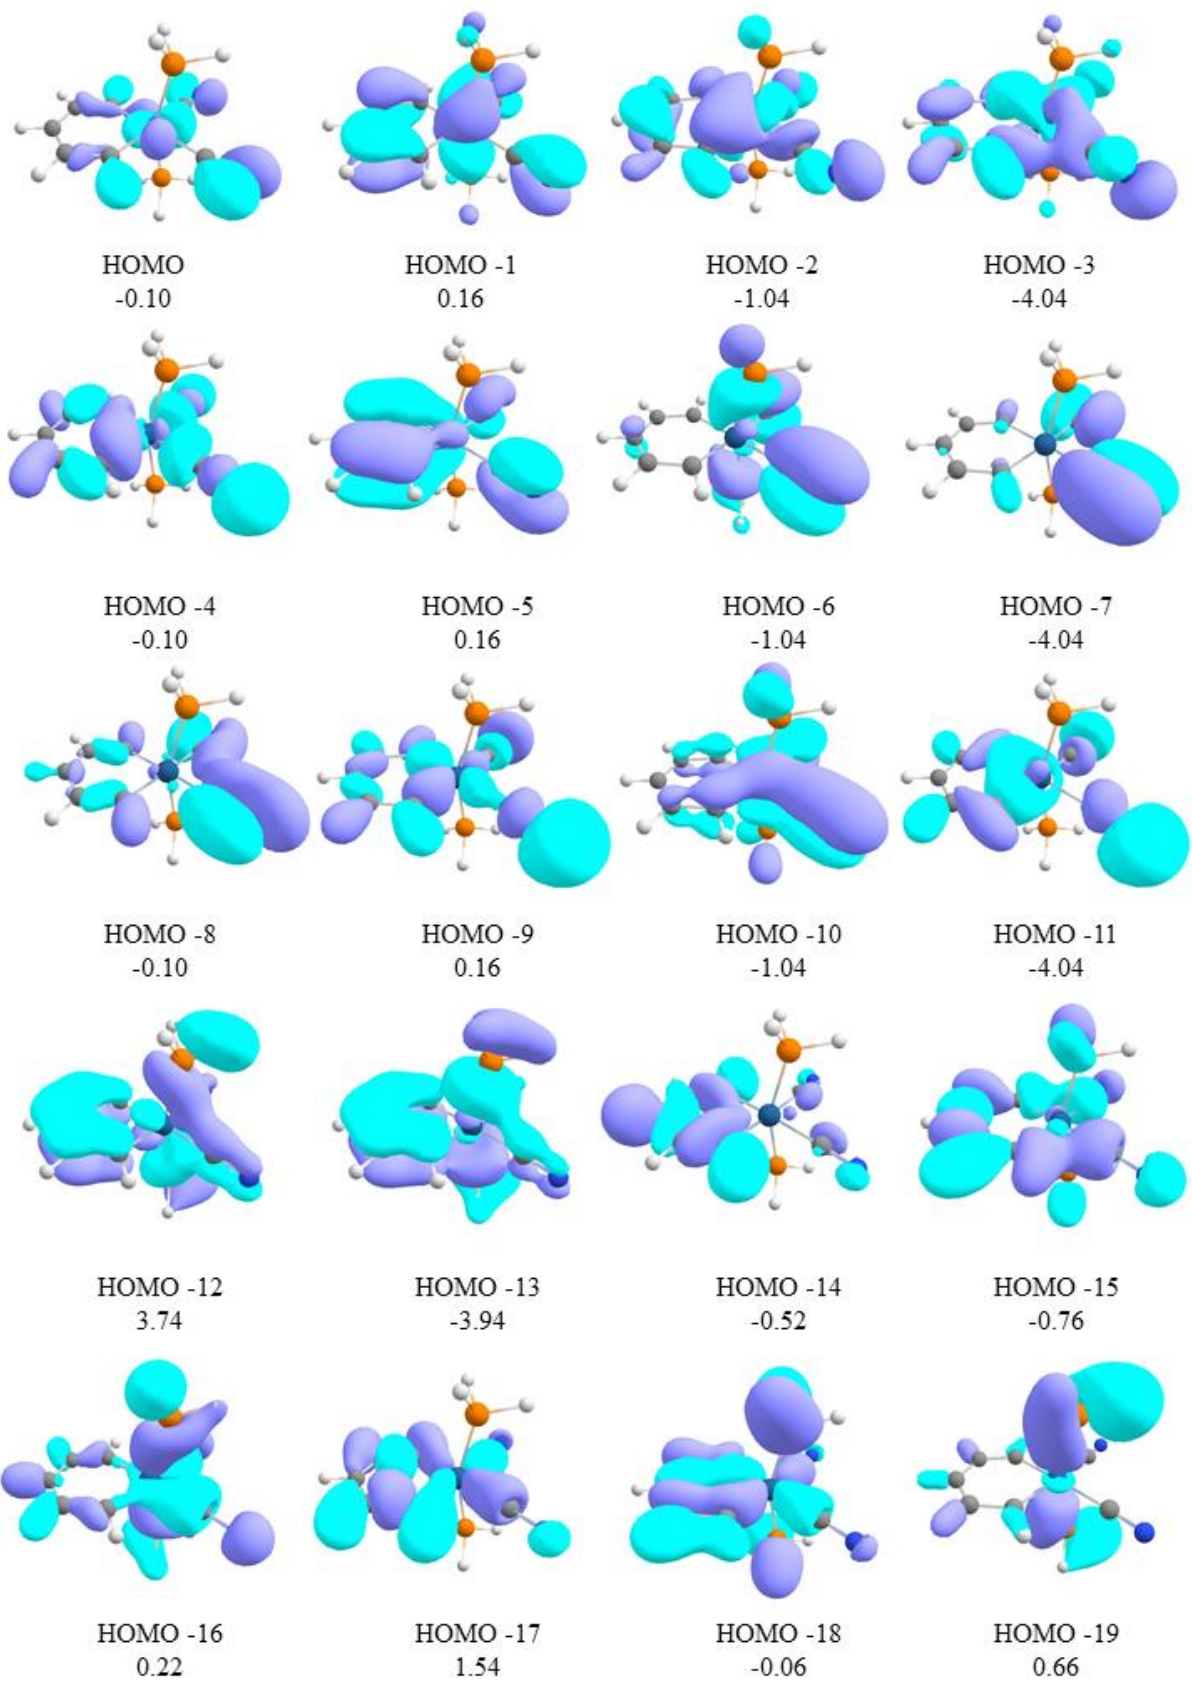

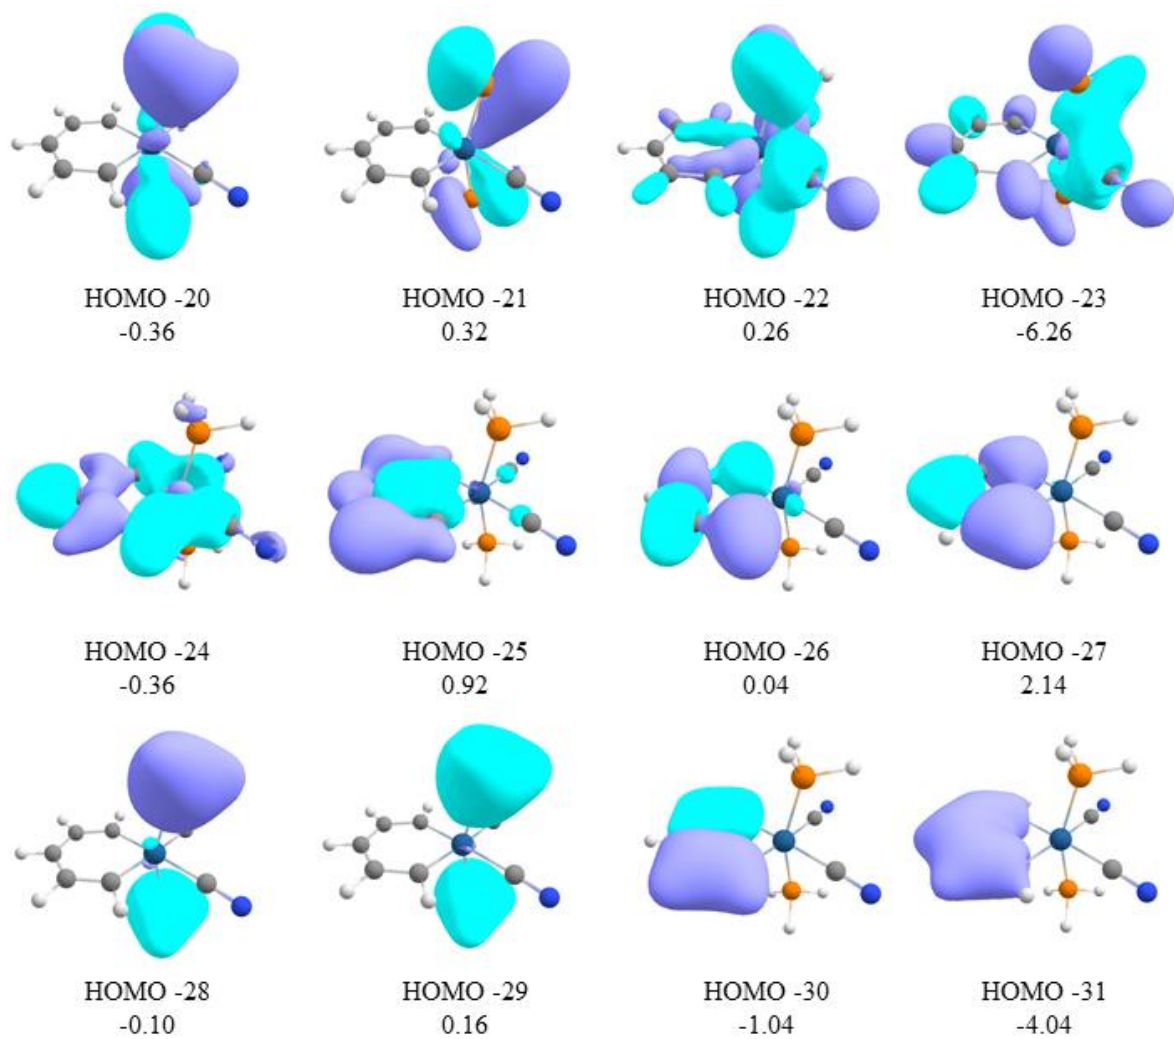

**Figure S2.** Valence molecular orbitals of molecule **2** and their contribution to the magnetically induced current intensity in  $\text{nA}\cdot\text{T}^{-1}$ .

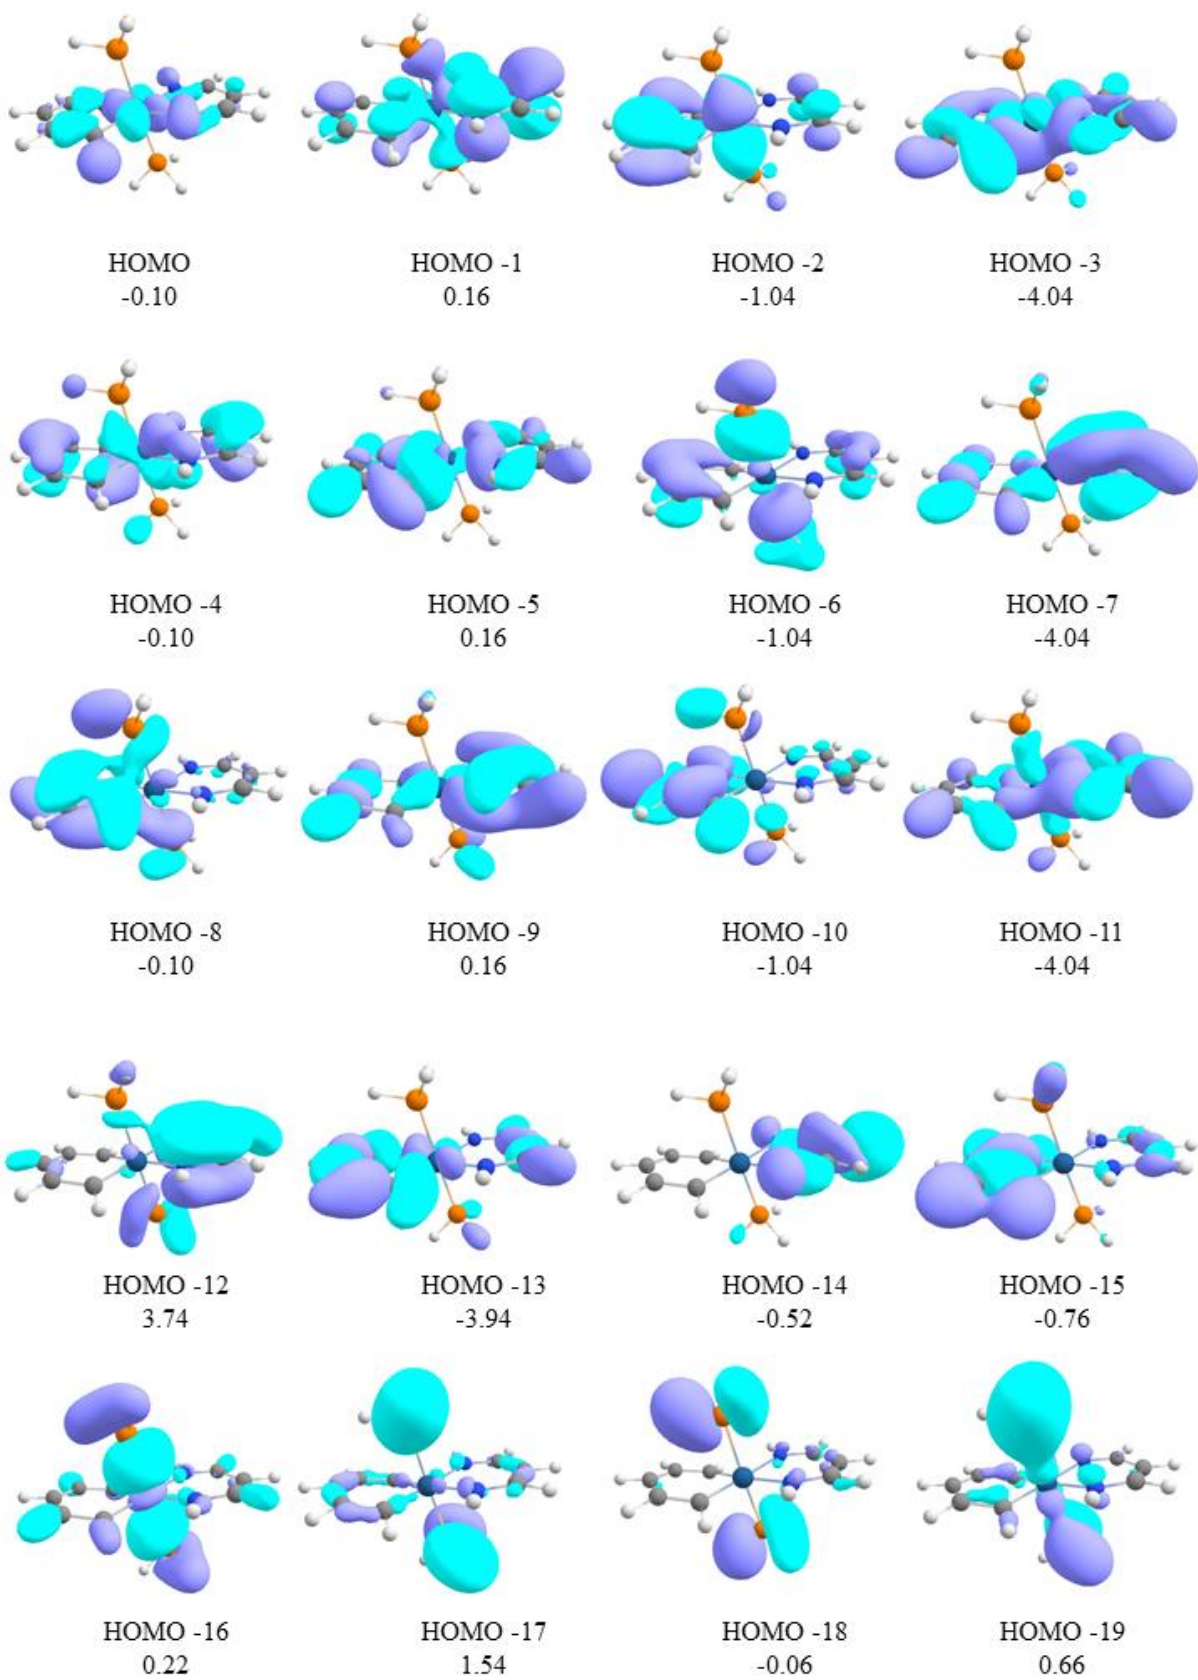

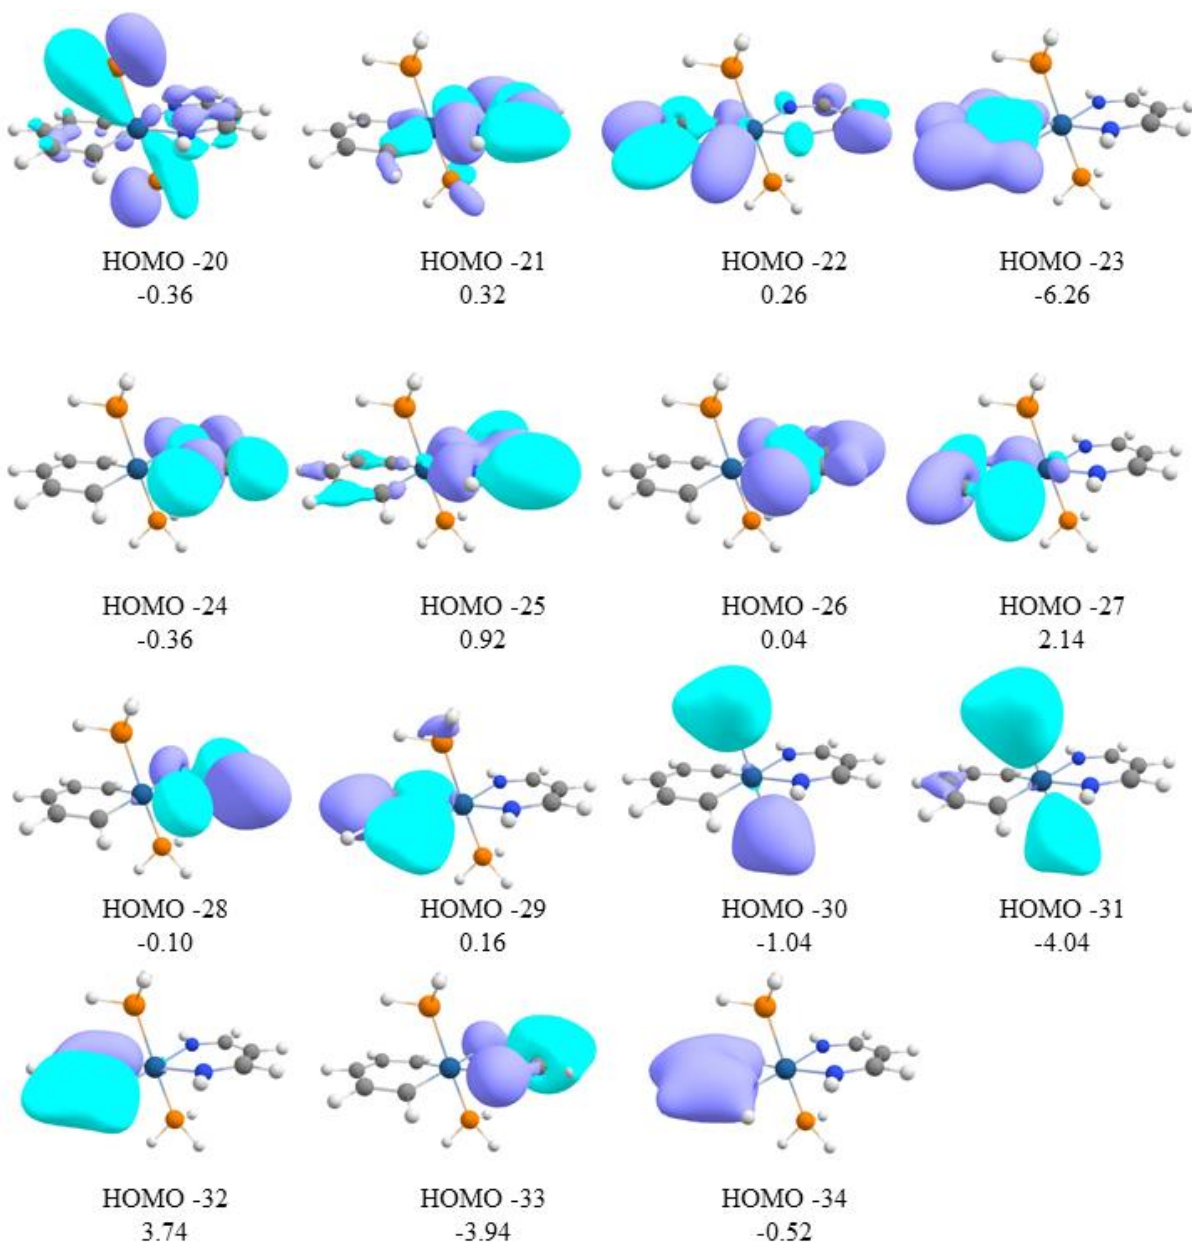

**Figure S3.** Valence molecular orbitals of molecule **3** and their contribution to the magnetically induced current intensity in  $\text{nA}\cdot\text{T}^{-1}$ .



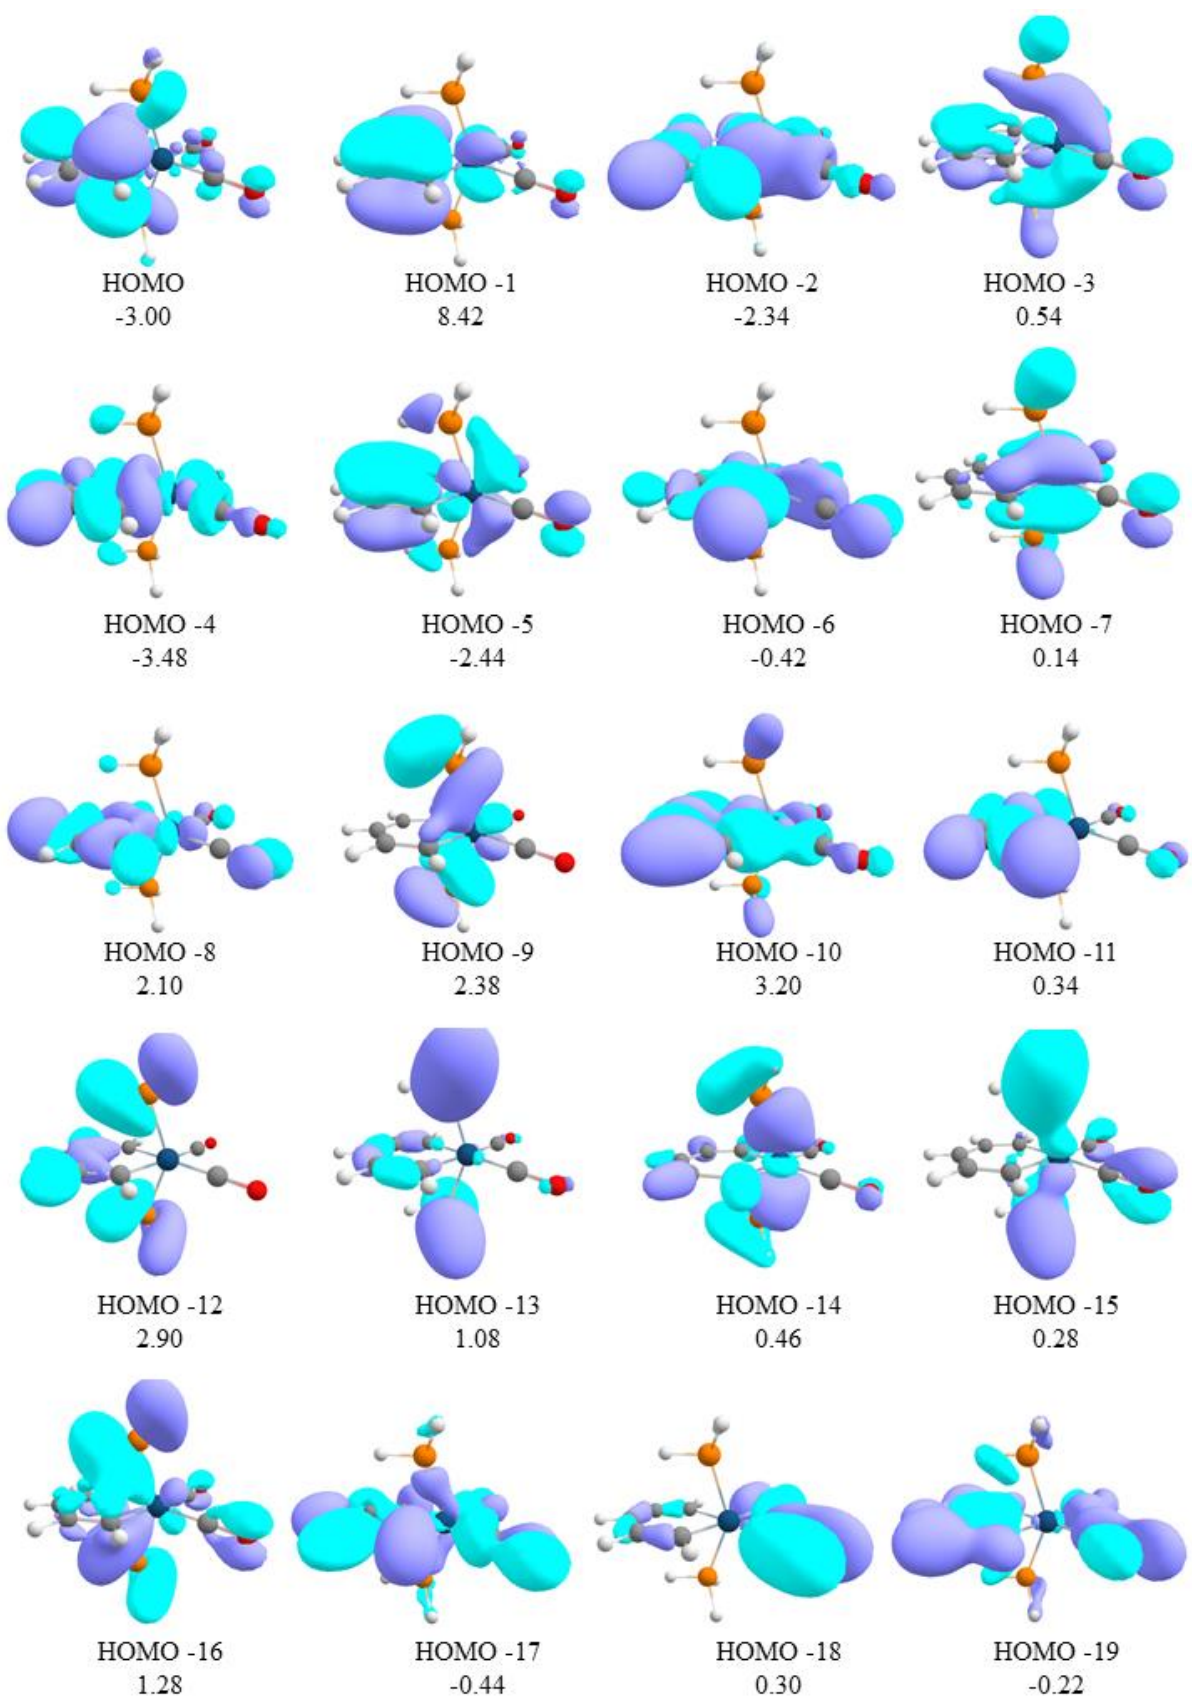

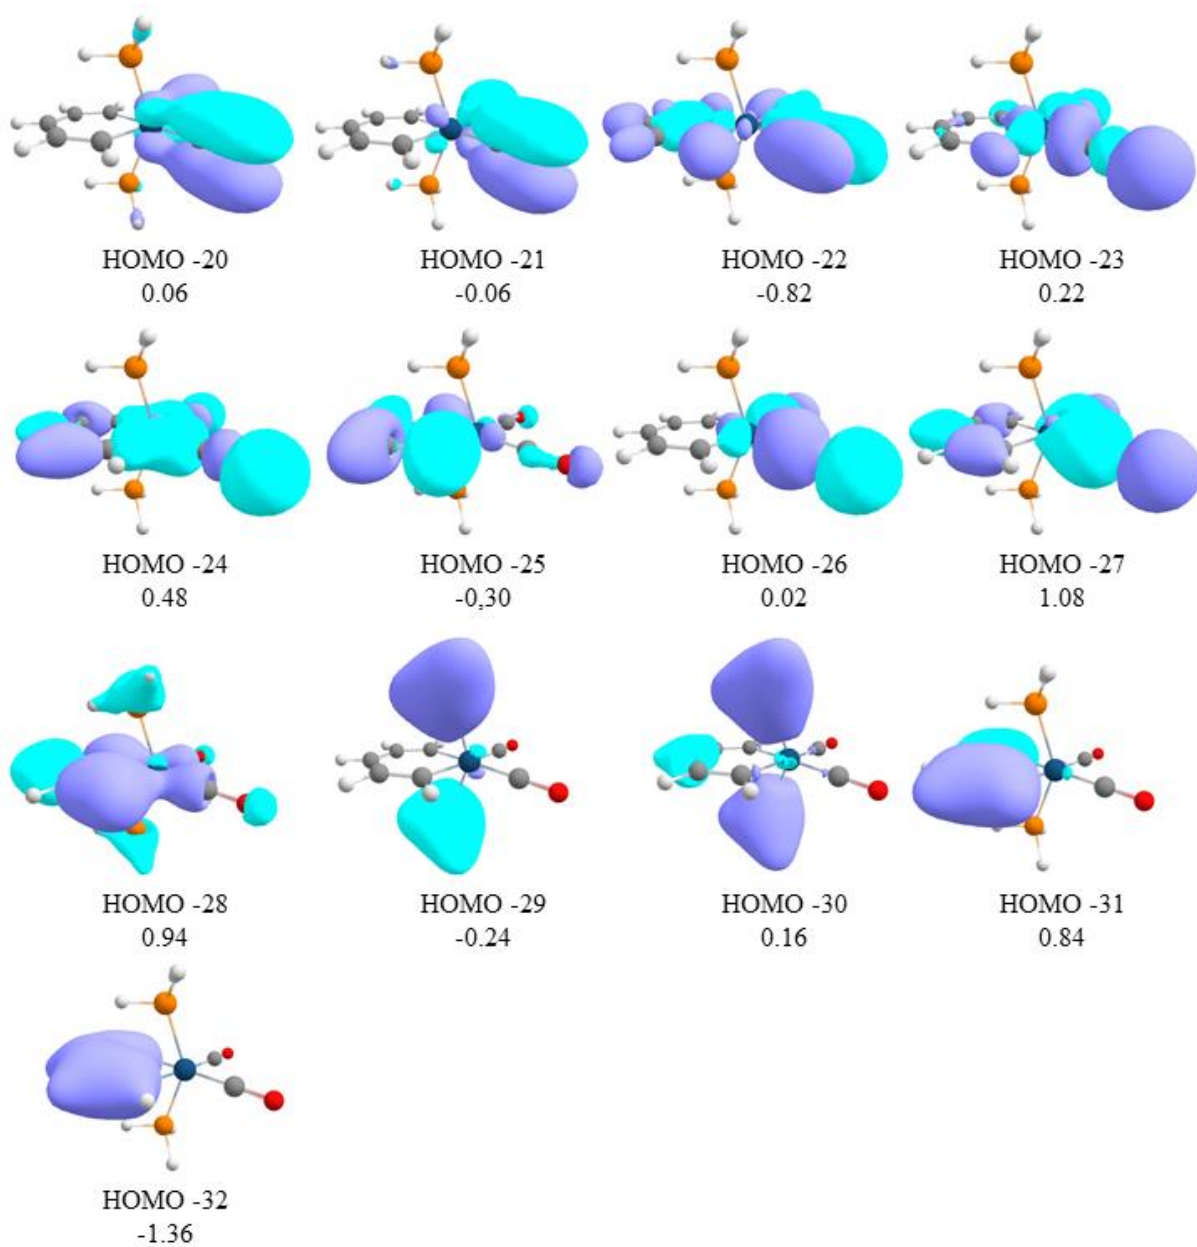

**Figure S4.** Valence molecular orbitals of molecule **4** and their contribution to the magnetically induced current intensity in nA.T<sup>-1</sup>.

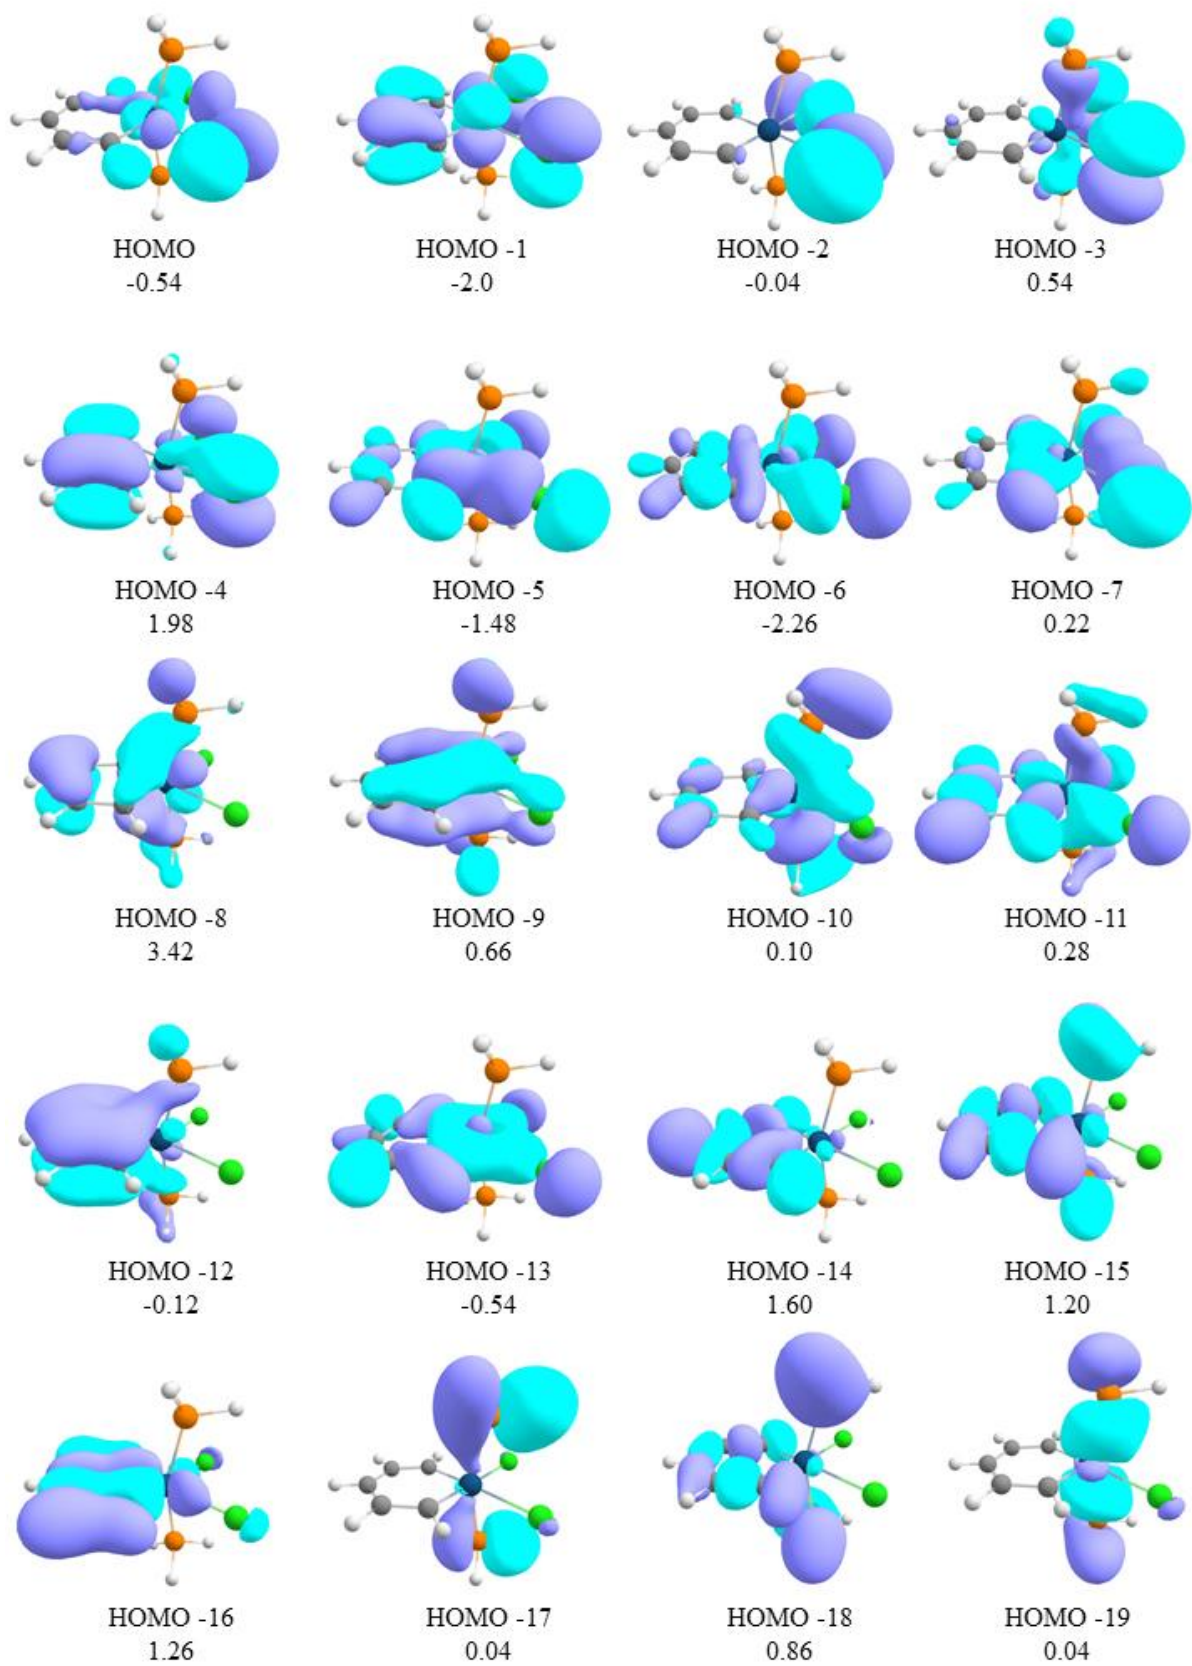

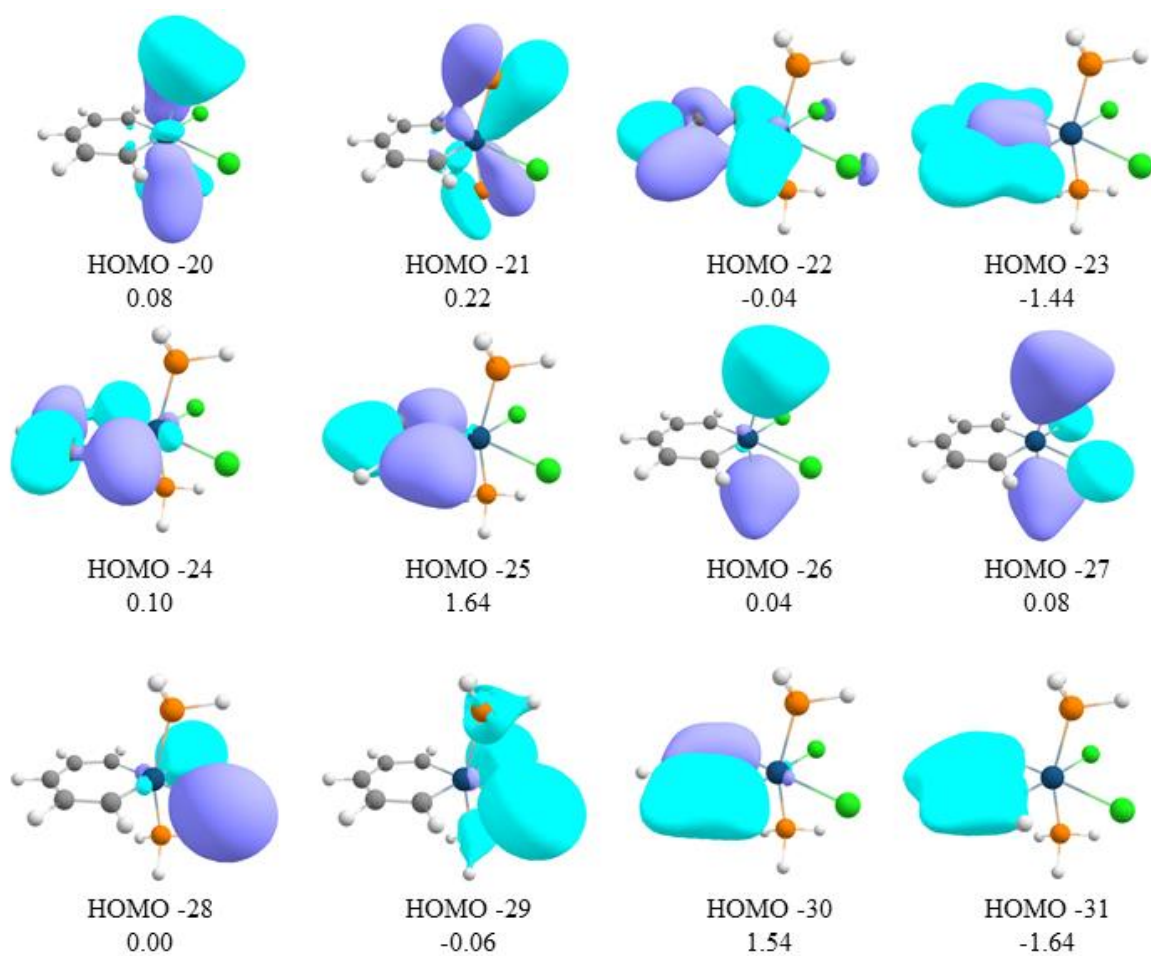

**Figure S5.** Valence molecular orbitals of molecule **5** and their contribution to the magnetically induced current intensity in  $\text{nA}\cdot\text{T}^{-1}$ .

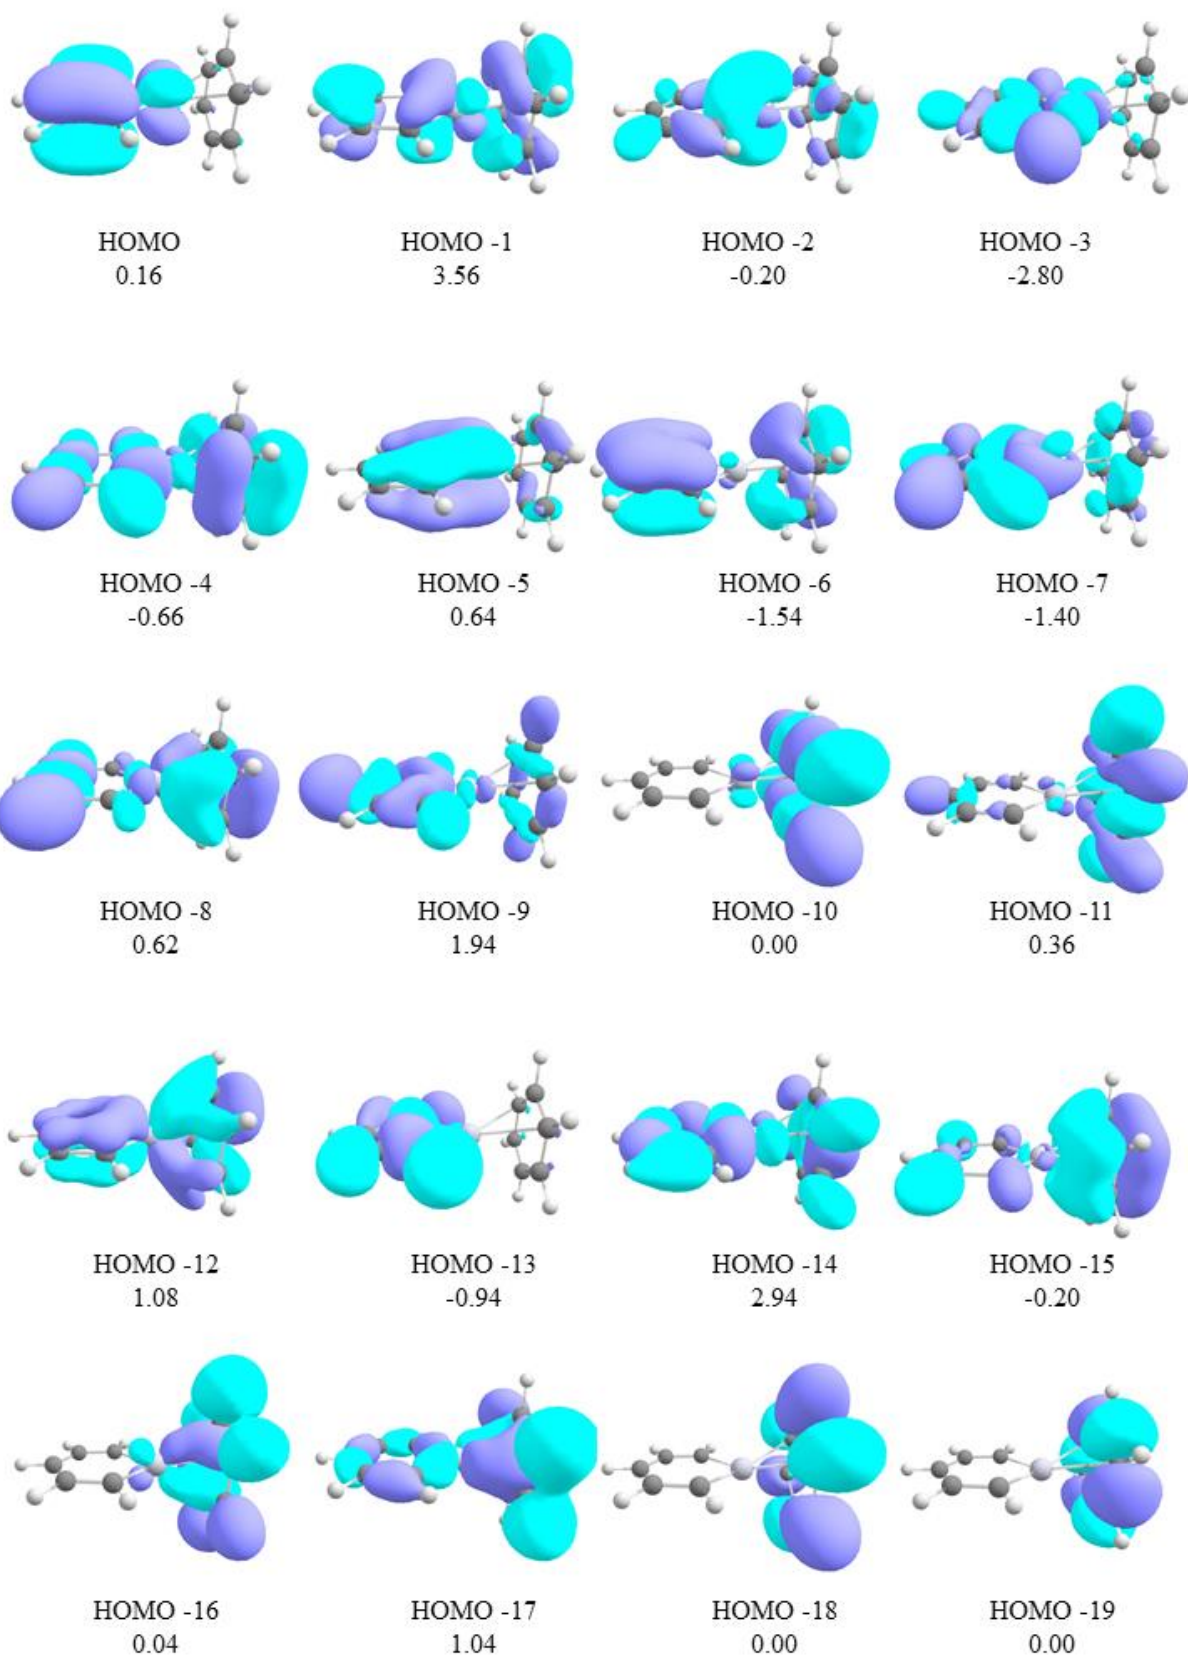

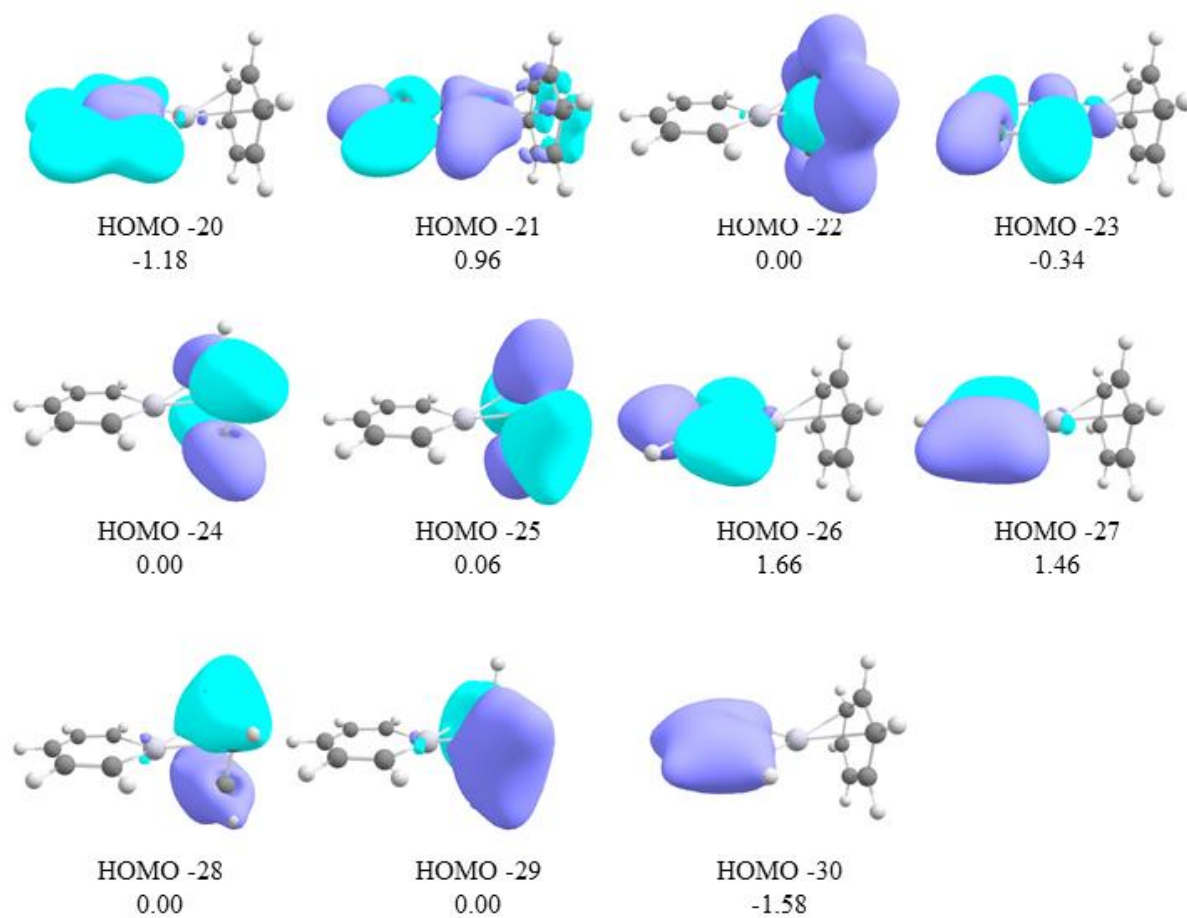

**Figure S6.** Valence molecular orbitals of molecule **6** and their contribution to the magnetically induced current intensity in nA.T<sup>-1</sup>.

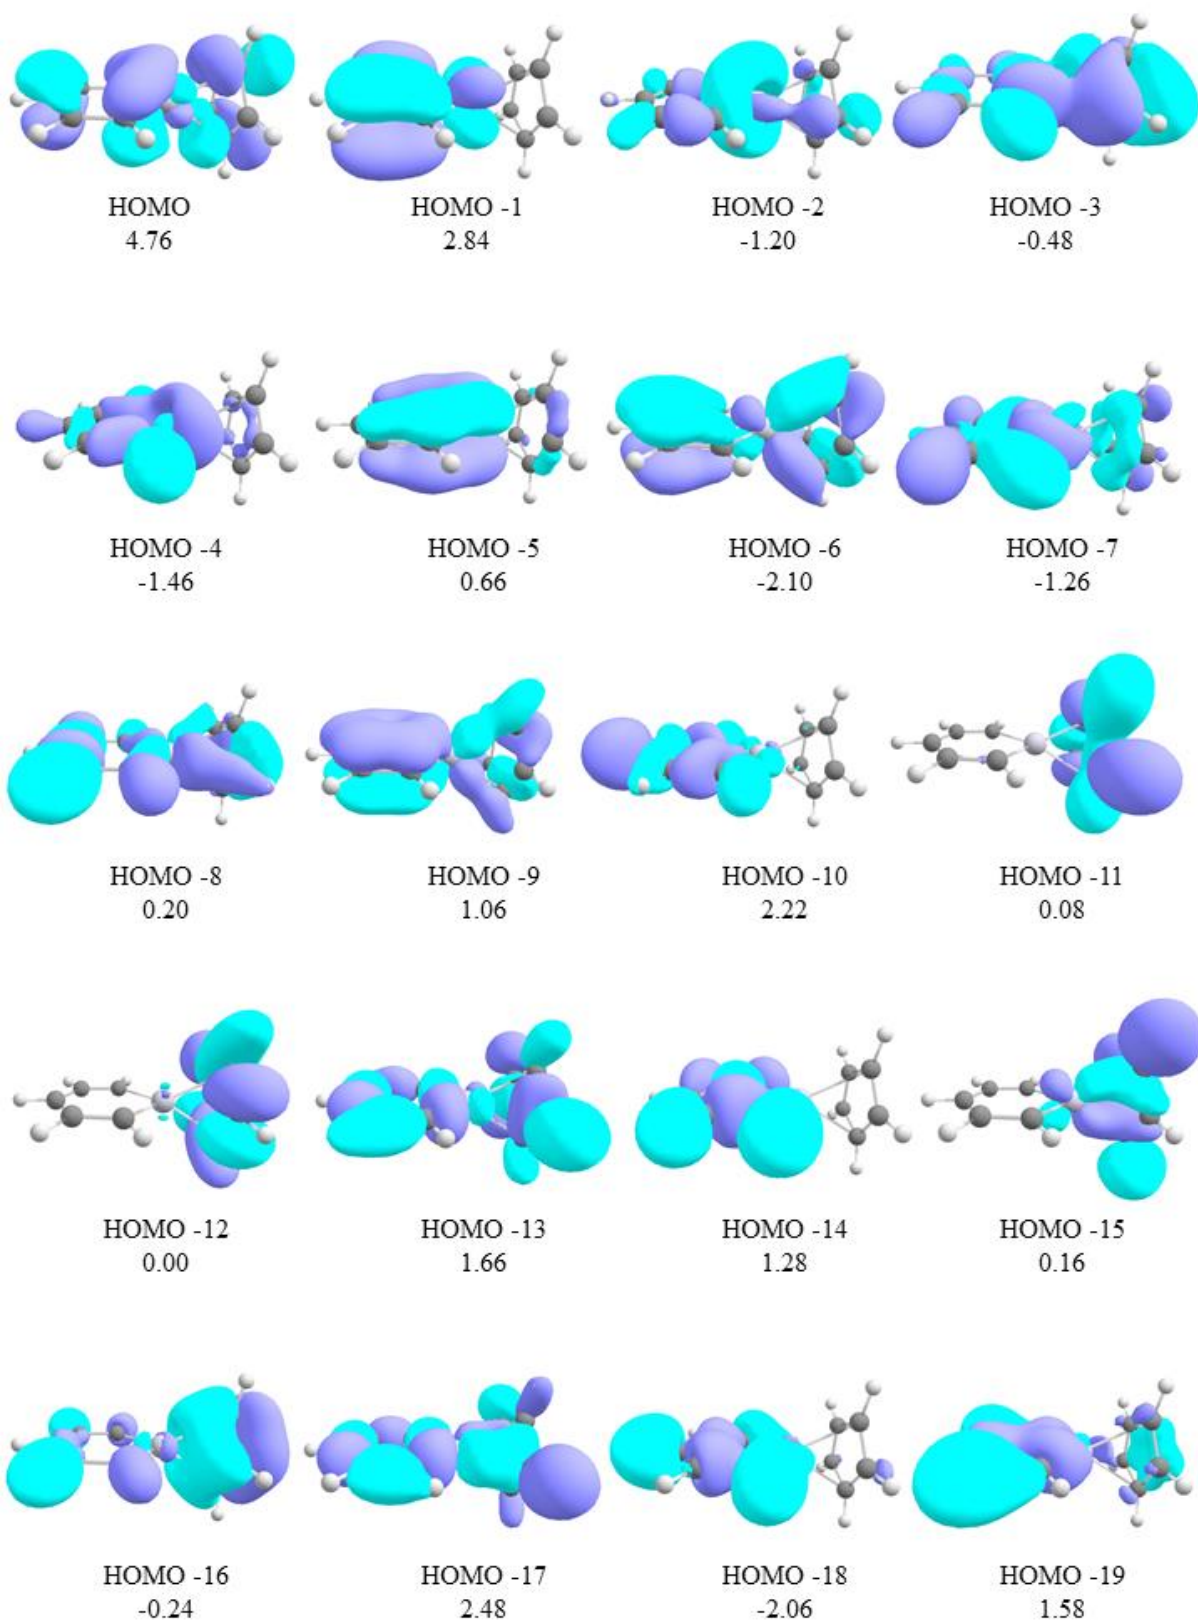

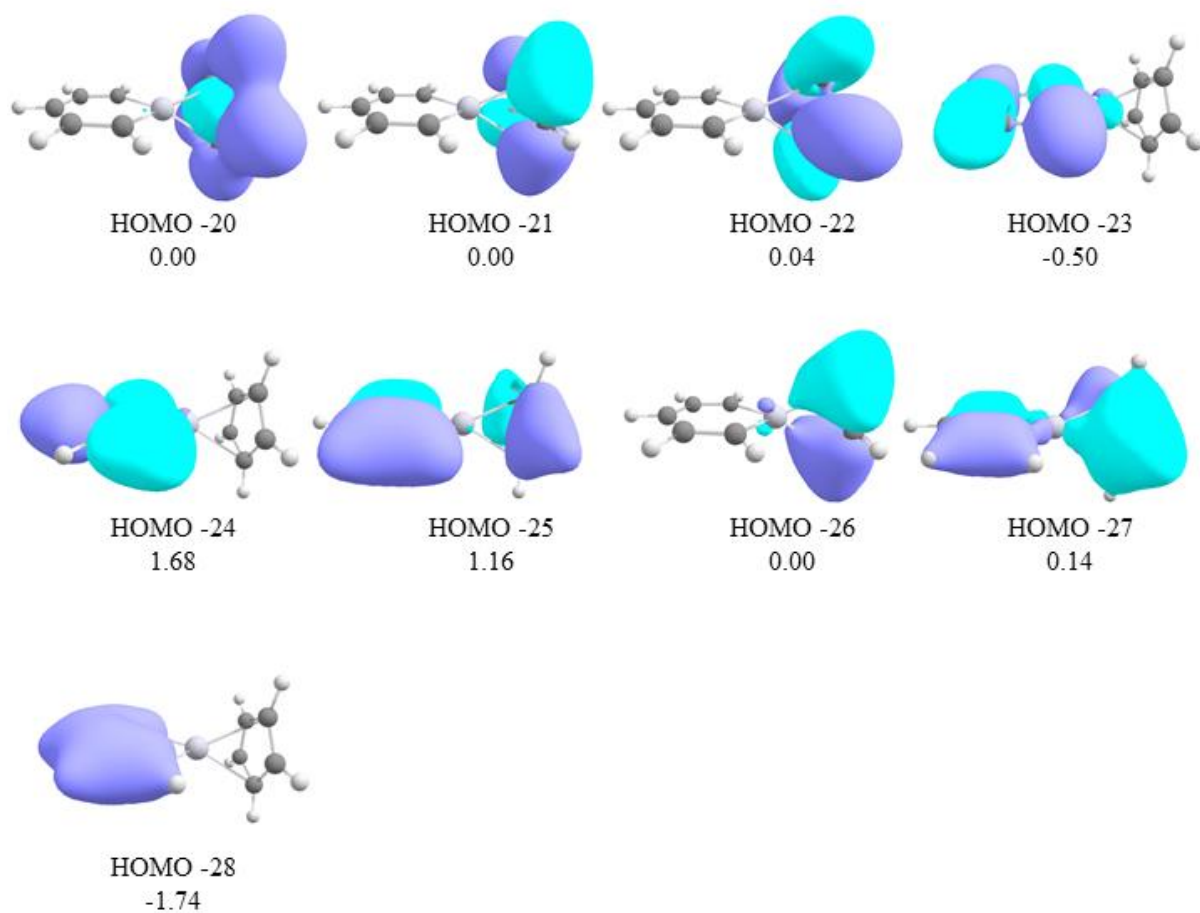

**Figure S7.** Valence molecular orbitals of molecule **7** and their contribution to the magnetically induced current intensity in  $\text{nA}\cdot\text{T}^{-1}$ .



## Cartesian Coordinates (Å)

### 1

|    |          |          |          |
|----|----------|----------|----------|
| Os | -1.50799 | 0.11623  | 1.24714  |
| I  | -3.82740 | 0.29195  | 2.87008  |
| P  | -1.99064 | -2.14753 | 1.50346  |
| P  | -1.80768 | 2.42553  | 1.26976  |
| O  | 0.52087  | 0.15252  | 3.54562  |
| C  | 0.04798  | -0.08085 | -1.39137 |
| C  | -1.06582 | -0.07780 | -2.20358 |
| C  | 0.01947  | -0.00836 | 0.00497  |
| C  | -2.39889 | -0.00164 | -1.75690 |
| C  | -2.73711 | 0.07942  | -0.43529 |
| C  | -0.27420 | 0.14223  | 2.72183  |
| H  | -0.90121 | -0.13918 | -3.27584 |
| H  | 1.02979  | -0.02745 | 0.42244  |
| H  | -3.17351 | -0.00963 | -2.51957 |
| H  | -3.81610 | 0.13154  | -0.26010 |
| H  | 1.01615  | -0.14458 | -1.88038 |
| H  | -1.19530 | -3.11747 | 0.85260  |
| H  | -1.98930 | -2.67937 | 2.80437  |
| H  | -3.25982 | -2.55763 | 1.06362  |
| H  | -1.75868 | 3.08520  | 2.50978  |
| H  | -0.94026 | 3.25773  | 0.52682  |
| H  | -3.04195 | 2.88854  | 0.78531  |

### 2

|    |          |          |          |
|----|----------|----------|----------|
| C  | -0.04129 | 0.00000  | -0.04343 |
| C  | -1.22627 | -0.00071 | -0.77553 |
| C  | -2.51126 | 0.00000  | -0.23795 |
| C  | -2.77868 | 0.01165  | 1.12584  |
| C  | 0.00932  | -0.00933 | 1.34544  |
| H  | 0.88570  | 0.00645  | -0.61633 |
| H  | -1.14079 | -0.00137 | -1.86110 |
| H  | -3.33714 | -0.00632 | -0.94890 |
| H  | -3.85691 | -0.00509 | 1.32734  |
| H  | 1.04268  | 0.00990  | 1.71323  |
| Os | -1.50000 | 0.00000  | 2.70000  |
| P  | -1.80413 | -2.23800 | 3.11235  |
| H  | -0.98989 | -3.22882 | 2.51270  |
| H  | -1.66263 | -2.64537 | 4.45129  |
| H  | -3.05456 | -2.83281 | 2.83614  |
| P  | -1.26456 | 2.23676  | 3.16095  |
| H  | -1.61422 | 2.64056  | 4.46225  |
| H  | 0.01366  | 2.83193  | 3.08584  |
| H  | -1.97471 | 3.22958  | 2.44378  |
| C  | -0.03556 | -0.11569 | 4.18785  |
| N  | 0.83493  | -0.17373 | 4.95777  |
| C  | -3.17960 | 0.11251  | 3.94017  |
| N  | -4.16006 | 0.16904  | 4.56419  |

### 3

|    |          |          |          |
|----|----------|----------|----------|
| C  | 0.00438  | -0.01099 | -0.00892 |
| C  | -1.17145 | -0.10009 | -0.75772 |
| C  | -2.46482 | -0.22401 | -0.24501 |
| C  | -2.74338 | -0.23558 | 1.11739  |
| C  | 0.01950  | 0.00248  | 1.38149  |
| H  | 0.93995  | -0.05772 | -0.56200 |
| H  | -1.06214 | -0.17115 | -1.83700 |
| H  | -3.25786 | -0.42013 | -0.96333 |
| H  | -3.77872 | -0.54395 | 1.33031  |
| H  | 1.03348  | -0.12821 | 1.79031  |
| Os | -1.52603 | 0.29441  | 2.59455  |
| P  | -1.62276 | 2.43067  | 1.70243  |
| H  | -1.50147 | 2.53026  | 0.30212  |
| H  | -2.78246 | 3.21756  | 1.88715  |
| H  | -0.66267 | 3.39572  | 2.08330  |
| P  | -1.44103 | -1.81372 | 3.57884  |

|   |          |          |         |
|---|----------|----------|---------|
| H | -0.43422 | -2.07597 | 4.53677 |
| H | -2.55404 | -2.25825 | 4.32966 |
| H | -1.26445 | -2.96699 | 2.78541 |
| H | 0.72778  | 1.10410  | 4.02148 |
| H | -4.11059 | 0.69476  | 3.55929 |
| C | -3.08874 | 0.99904  | 5.18443 |
| C | -0.61748 | 1.20803  | 5.42062 |
| H | 0.16477  | 1.48949  | 6.12691 |
| H | -4.02559 | 1.13546  | 5.72636 |
| C | -1.91906 | 1.17548  | 5.92870 |
| H | -2.03814 | 1.39505  | 6.98031 |
| N | -0.25854 | 0.95544  | 4.18587 |
| N | -3.16202 | 0.70948  | 3.90846 |

#### 4

|    |          |          |          |
|----|----------|----------|----------|
| C  | -0.04239 | 0.04354  | -0.05292 |
| C  | -1.11234 | 0.00000  | -0.96633 |
| C  | -2.47318 | -0.04354 | -0.60965 |
| C  | -3.02706 | -0.05265 | 0.64005  |
| C  | -0.08763 | 0.05265  | 1.31327  |
| H  | 0.95206  | 0.07393  | -0.49700 |
| H  | -0.87073 | 0.00000  | -2.02127 |
| H  | -3.17523 | -0.07393 | -1.44227 |
| H  | -4.10575 | -0.08865 | 0.73304  |
| H  | 0.84306  | 0.08865  | 1.86647  |
| Ir | -1.88573 | 0.00000  | 2.41048  |
| P  | -1.65448 | -2.20001 | 1.74491  |
| H  | -0.62844 | -2.99531 | 2.30428  |
| H  | -2.76496 | -3.07185 | 1.81496  |
| H  | -1.33985 | -2.25117 | 0.37917  |
| P  | -1.80426 | 2.20001  | 1.71061  |
| H  | -2.97148 | 2.99531  | 1.76766  |
| H  | -0.83496 | 3.07185  | 2.25698  |
| H  | -1.49311 | 2.25117  | 0.34407  |
| C  | -3.59420 | -0.05094 | 3.33603  |
| C  | -0.75040 | 0.05094  | 3.98735  |
| O  | -4.60937 | -0.08154 | 3.84286  |
| O  | -0.05701 | 0.08154  | 4.88549  |

#### 5

|    |          |          |          |
|----|----------|----------|----------|
| C  | 0.01186  | -0.03161 | -0.05758 |
| C  | -1.15078 | -0.10000 | -0.82263 |
| C  | -2.44707 | -0.16839 | -0.31603 |
| C  | -2.73577 | -0.17645 | 1.03207  |
| C  | 0.01396  | -0.02355 | 1.32108  |
| H  | 0.95890  | 0.01630  | -0.58628 |
| H  | -1.03722 | -0.10000 | -1.90304 |
| H  | -3.26350 | -0.21630 | -1.03007 |
| H  | -3.79708 | -0.23541 | 1.28496  |
| H  | 0.99951  | 0.03541  | 1.78910  |
| Ir | -1.50528 | -0.10000 | 2.55024  |
| P  | -1.54971 | -2.35779 | 2.97295  |
| H  | -1.41877 | -2.63296 | 4.33933  |
| H  | -2.72057 | -3.05330 | 2.63059  |
| H  | -0.57006 | -3.20479 | 2.41594  |
| P  | -1.54971 | 2.15779  | 2.97295  |
| H  | -1.96187 | 2.43296  | 4.28225  |
| H  | -0.33326 | 2.85330  | 2.88150  |
| H  | -2.39214 | 3.00479  | 2.22443  |
| Cl | -3.44921 | -0.24634 | 4.05473  |
| Cl | 0.08337  | 0.04634  | 4.42602  |

#### 6

|    |          |          |          |
|----|----------|----------|----------|
| C  | -0.58484 | 0.77296  | 4.61260  |
| C  | -1.80140 | 1.45551  | 4.44284  |
| C  | -2.99190 | 0.72648  | 4.28185  |
| C  | -2.96519 | -0.67617 | 4.28514  |
| C  | -1.74801 | -1.35880 | 4.44980  |
| C  | -0.55828 | -0.62969 | 4.61587  |
| H  | 0.33459  | 1.33156  | 4.72506  |
| H  | -1.82019 | 2.53664  | 4.42763  |
| H  | -3.92809 | 1.24924  | 4.13932  |
| H  | -3.88088 | -1.23477 | 4.14535  |
| H  | -1.72574 | -2.43991 | 4.43972  |
| H  | 0.38168  | -1.15246 | 4.73108  |
| Pt | -1.50616 | 0.04952  | 2.49187  |
| C  | -2.64718 | 0.02477  | 0.92981  |
| C  | 0.01387  | 0.07616  | 1.29546  |
| H  | 0.96882  | 0.09462  | 1.82158  |
| H  | -3.70861 | 0.00429  | 1.17885  |
| C  | -2.34610 | 0.02879  | -0.40118 |
| C  | 0.08289  | 0.07570  | -0.06741 |
| H  | -3.16168 | 0.01199  | -1.11552 |
| H  | 1.06089  | 0.09353  | -0.53529 |
| C  | -1.04158 | 0.05316  | -0.88959 |
| H  | -0.89398 | 0.05468  | -1.96399 |

## 7

|    |          |          |          |
|----|----------|----------|----------|
| C  | -1.24389 | 1.22585  | 4.66248  |
| C  | -2.61479 | 0.85696  | 4.52533  |
| C  | -2.68842 | -0.55403 | 4.51785  |
| C  | -1.36344 | -1.06504 | 4.65032  |
| C  | -0.47662 | 0.03676  | 4.74743  |
| H  | -0.86173 | 2.23309  | 4.70149  |
| H  | -3.44557 | 1.53911  | 4.44267  |
| H  | -3.58565 | -1.14509 | 4.42843  |
| H  | -1.08823 | -2.10695 | 4.67846  |
| H  | 0.59470  | -0.01972 | 4.85553  |
| C  | -0.00495 | 0.02995  | 1.41671  |
| C  | -2.66759 | 0.17003  | 1.15040  |
| H  | 0.97810  | -0.02374 | 1.88784  |
| H  | -3.72402 | 0.22363  | 1.41993  |
| C  | 0.01250  | 0.03631  | 0.04165  |
| C  | -2.41366 | 0.16395  | -0.20135 |
| H  | 0.97213  | -0.01100 | -0.46467 |
| H  | -3.25432 | 0.21136  | -0.88727 |
| C  | -1.13455 | 0.10018  | -0.74111 |
| Pt | -1.47512 | 0.09992  | 2.66342  |
| H  | -1.02642 | 0.10026  | -1.82074 |
